# Supplementary material for: MITF is a novel transcriptional regulator of the calcium sensor STIM1: Significance in physiological melanogenesis
Source: PubMed Central journal article supplement (PMC9723939; doi:10.1016/j.jbc.2022.102681), 2022-11-07

# Supplementary Figure 1. MITF silencing decreases STIM1 expression and activity

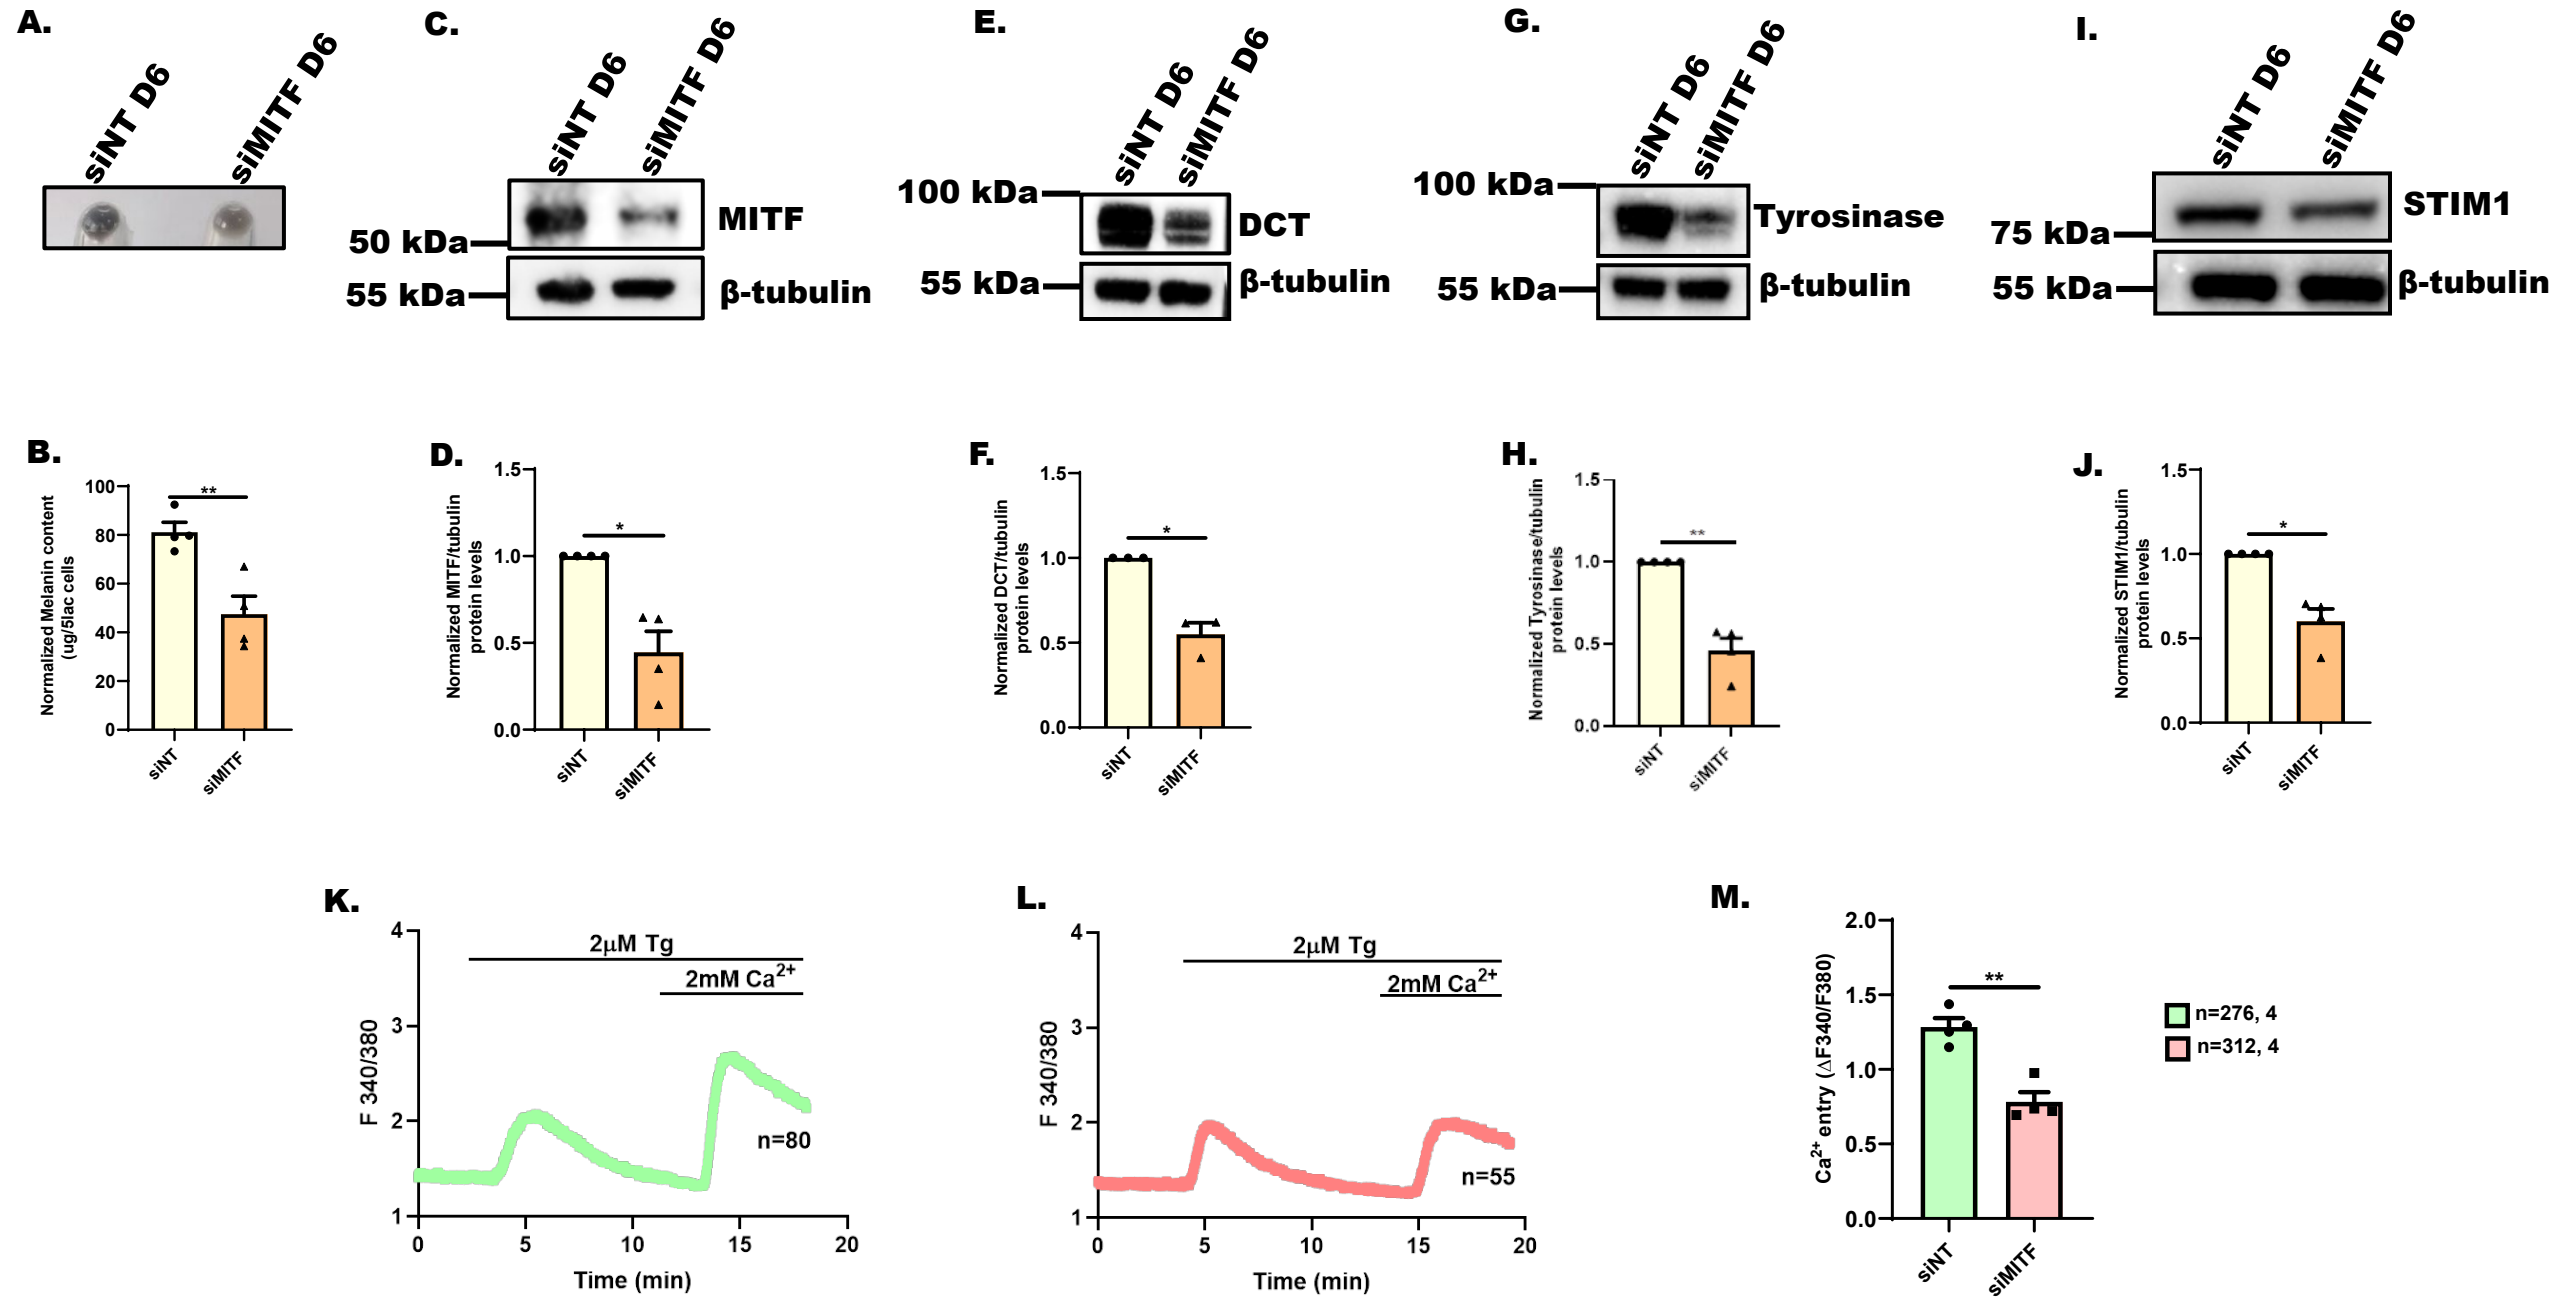

Supplement: mmc1.pdf [file mmc1.pdf]
